# Supplementary material for: Variation of Proteolytic Cleavage Sites towards the N-Terminal End of the S2 Subunit of the Novel SARS-CoV-2 Omicron Sublineage BA.2.12.1
Source: MDPI journal article supplement (doi:10.3390/molecules27185817), 2022-09-08

**Supplementary data S1:**

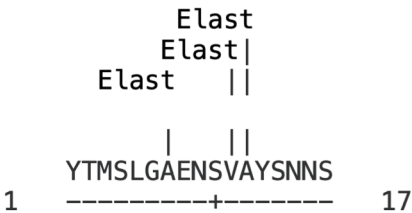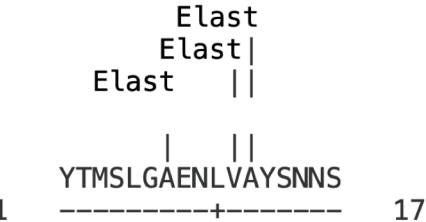

**Figure S1: Primary data from the “ExPASy peptide cutter”.** NE cleavage sites prediction of <sup>695</sup>YTMSLGAENSVAYSNNS<sub>711</sub> (S704 peptide) and <sup>695</sup>YTMSLGAENLVAYSNNS<sub>711</sub> (L704 peptide) by applying “ExPASy peptide cutter”. Elast = elastase.

## Supplementary data S2:

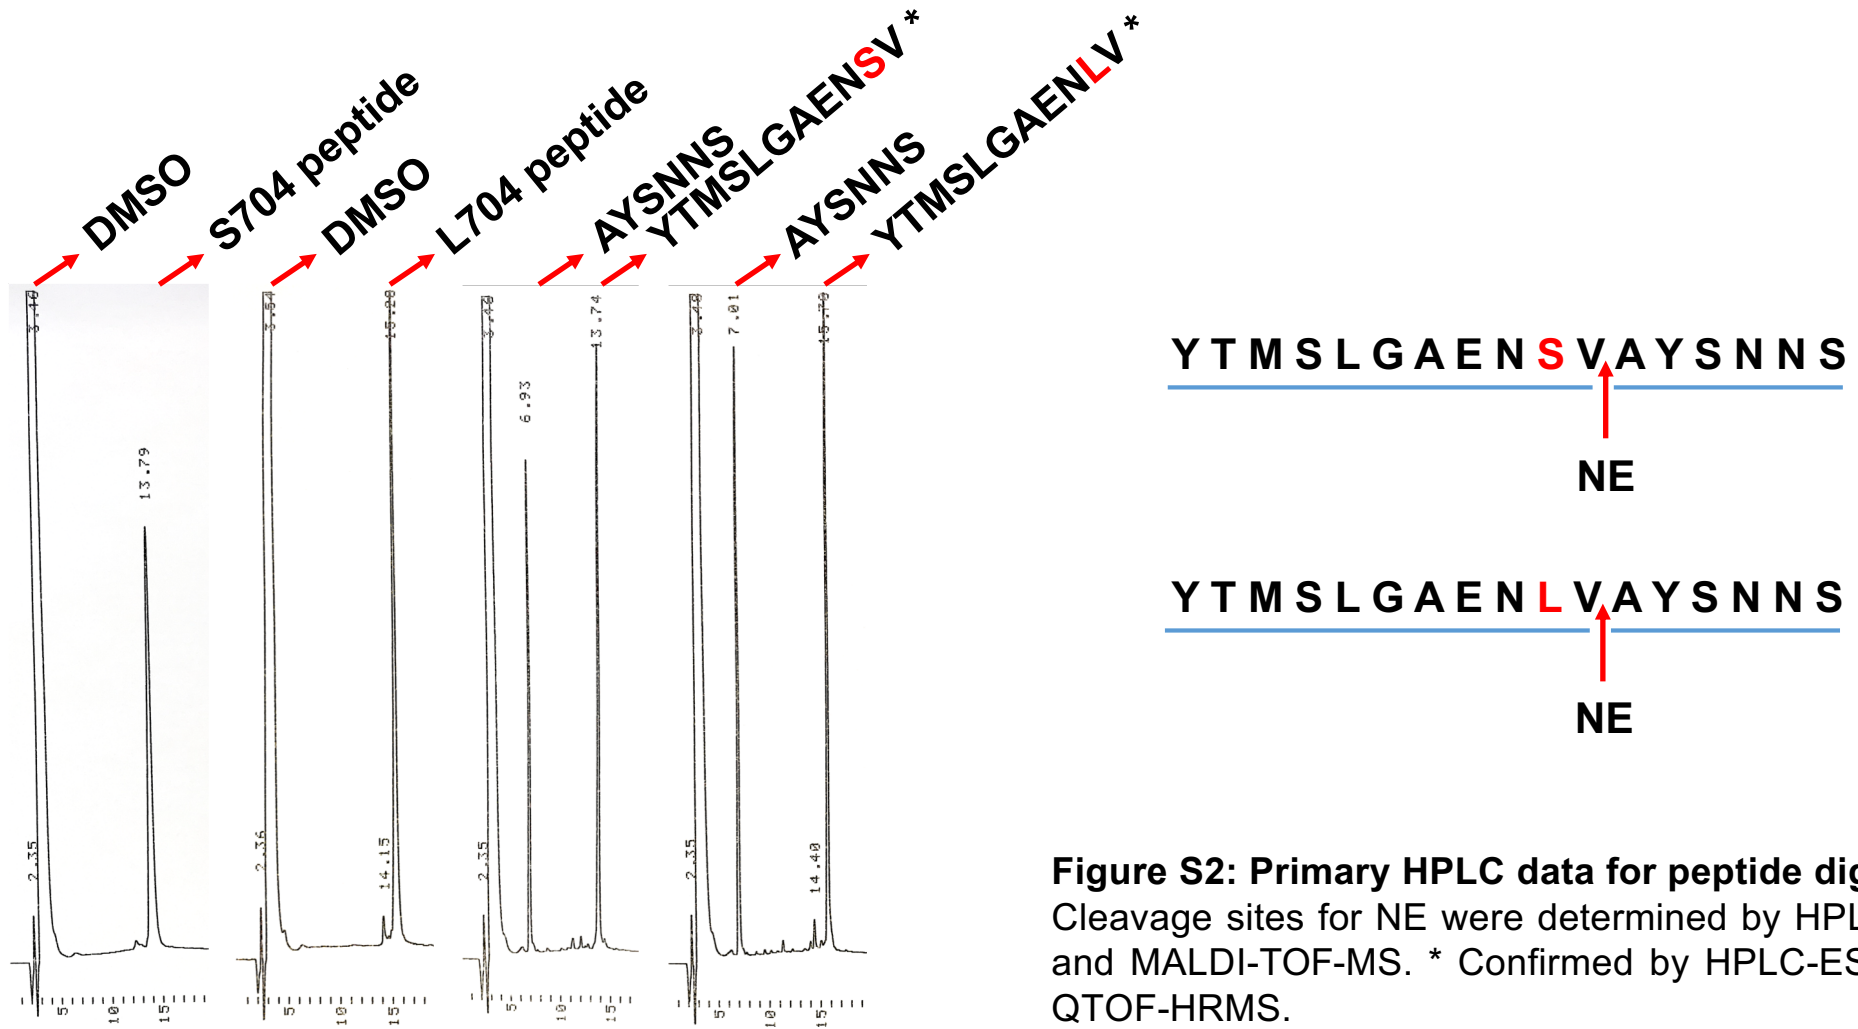

**Figure S2: Primary HPLC data for peptide digest.** Cleavage sites for NE were determined by HPLC and MALDI-TOF-MS. \* Confirmed by HPLC-ESI-QTOF-HRMS.

# Supplementary data S3:

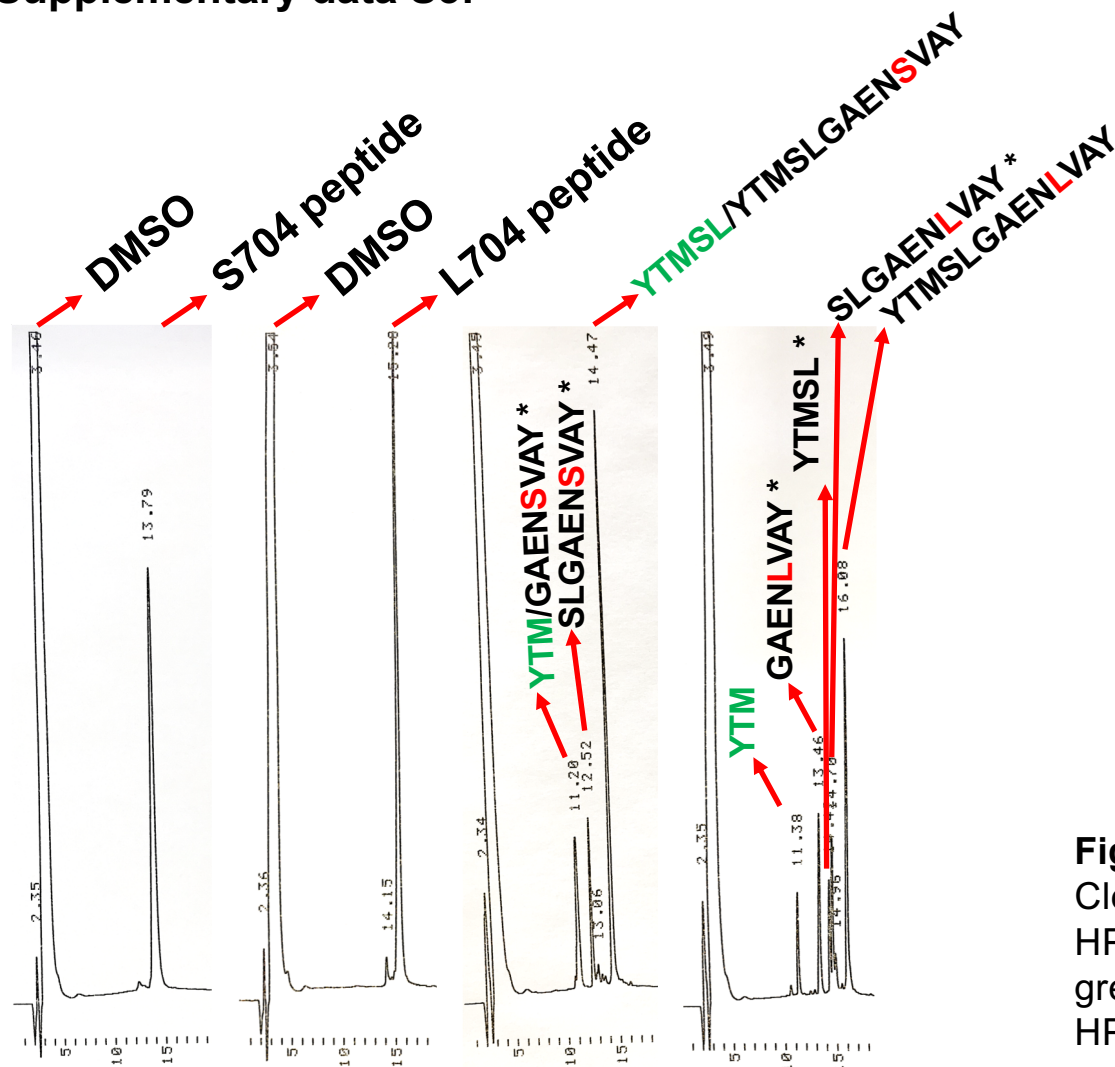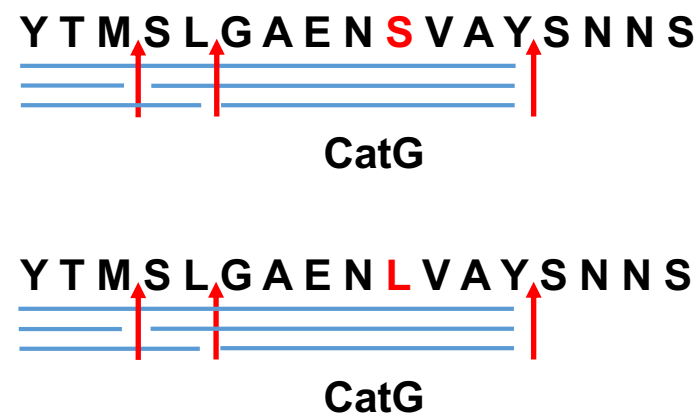

**Figure S3: Primary HPLC data for peptide digest.** Cleavage sites for CatG were determined by HPLC and MALDI-TOF-MS. Amino acids in green, HPLC-ESI-TOF-HRMS; \* Confirmed by HPLC-ESI-QTOF-HRMS.

## Supplementary data S4:

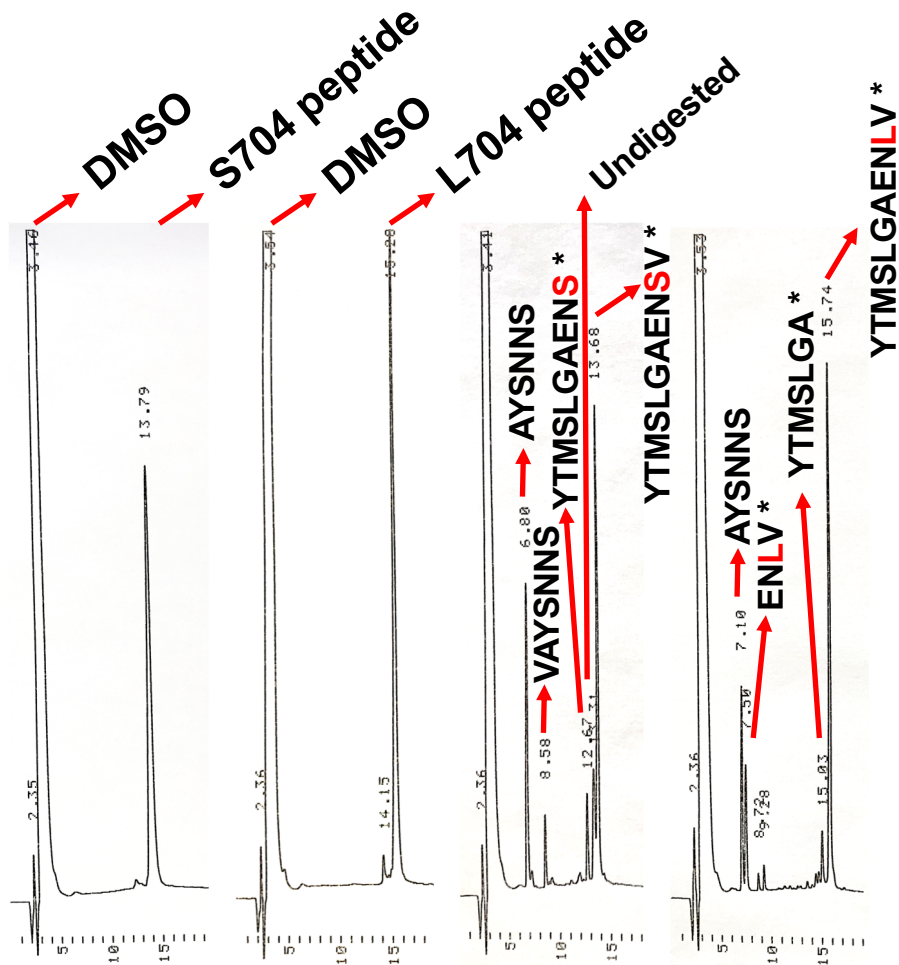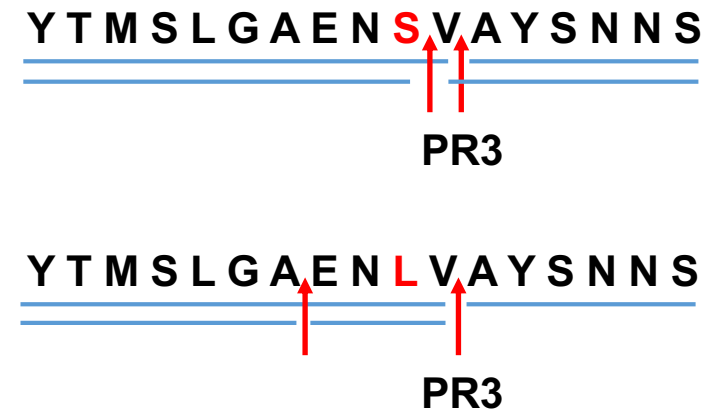

**Figure S4: Primary HPLC data for peptide digest.** Cleavage sites for PR3 were determined by HPLC and MALDI-TOF-MS. Amino acids in green, HPLC-ESI-TOF-HRMS; \* Confirmed by HPLC-ESI-QTOF-HRMS.

Supplementary data S5:

| S704 peptide |                         |                                     |               |
|--------------|-------------------------|-------------------------------------|---------------|
| Protease     | Mass [M+H] <sup>+</sup> | Expected<br>mass [M+H] <sup>+</sup> | Peptide       |
| NE           | 655.45                  | 655.27                              | AYSNNS        |
|              | 1172.52                 | 1171.53                             | YTMSLGAENSV   |
|              |                         |                                     |               |
| CatG         | 811.80                  | 810.36                              | GAENSVAY      |
|              | 1010.88                 | 1010.48                             | SLGAENSVAY    |
|              | 1405.27                 | 1405.63                             | YTMSLGAENSVAY |
|              |                         |                                     |               |
| PR3          | 655.43                  | 655.27                              | AYSNNS        |
|              | 754.46                  | 754.34                              | VAYSNNS       |
|              | 1072.95                 | 1072.46                             | YTMSLGAENS    |
|              | 1806.86                 | 1807.78                             | undigested    |
|              | 1171.84                 | 1171.53                             | YTMSLGAENSV   |

| L704 peptide |                         |                                     |               |
|--------------|-------------------------|-------------------------------------|---------------|
| Protease     | Mass [M+H] <sup>+</sup> | Expected<br>mass [M+H] <sup>+</sup> | Peptide       |
| NE           | 655.47                  | 655.27                              | AYSNNS        |
|              | 1197.54                 | 1197.58                             | YTMSLGAENLV   |
|              |                         |                                     |               |
| CatG         | 837.67                  | 836.41                              | GAENLVAY      |
|              | 615.61                  | 614.23                              | YTMSL         |
|              | 1036.81                 | 1036.53                             | SLGAENLVAY    |
|              | 1431.52                 | 1431.68                             | YTMSLGAENLVAY |
|              |                         |                                     |               |
| PR3          | 654.01                  | 655.27                              | AYSNNS        |
|              | 474.31                  | 474.26                              | ENLV          |
|              | 741.41                  | 742.34                              | YTMSLGA       |
|              | 1197.75                 | 1197.58                             | YTMSLGAENSV   |
|              |                         |                                     |               |
|              |                         |                                     |               |

Figure S5: Mass spectrometry data from MALDI-TOF-MS.

**Supplementary data S6:** Figure S6: Peptide digest with NE, high-resolution MS/MS-spectra from peptides.

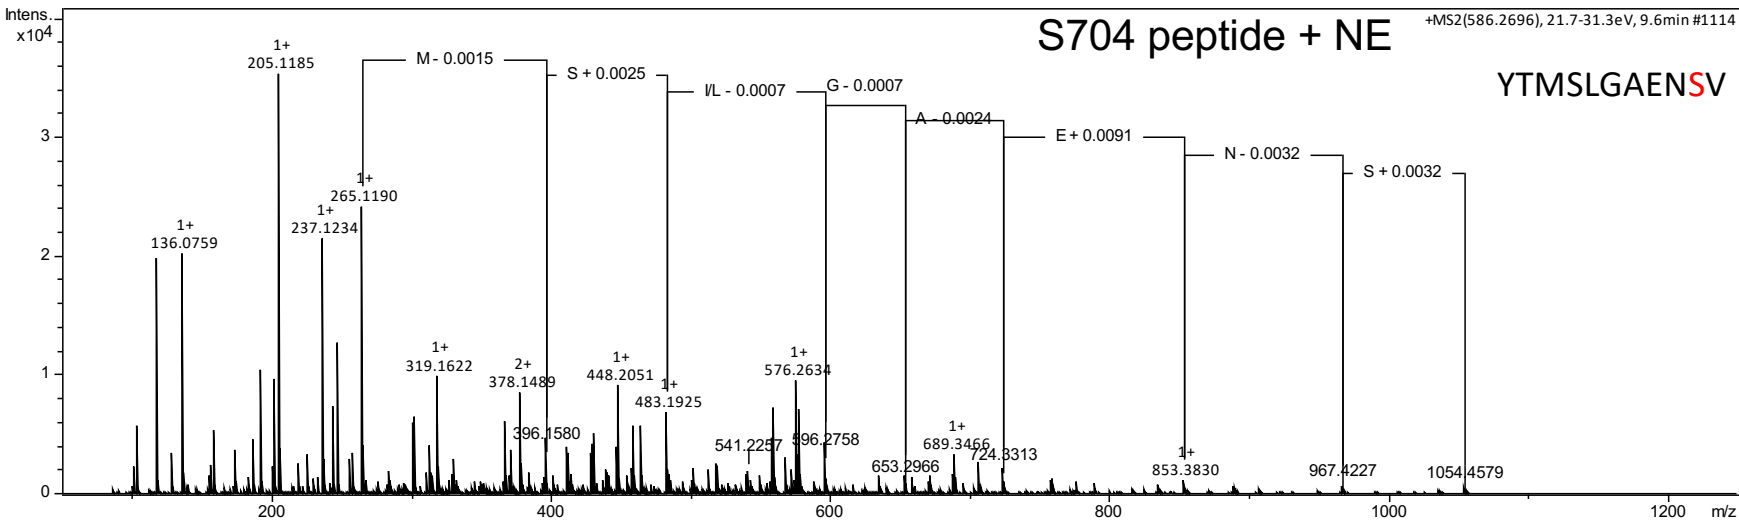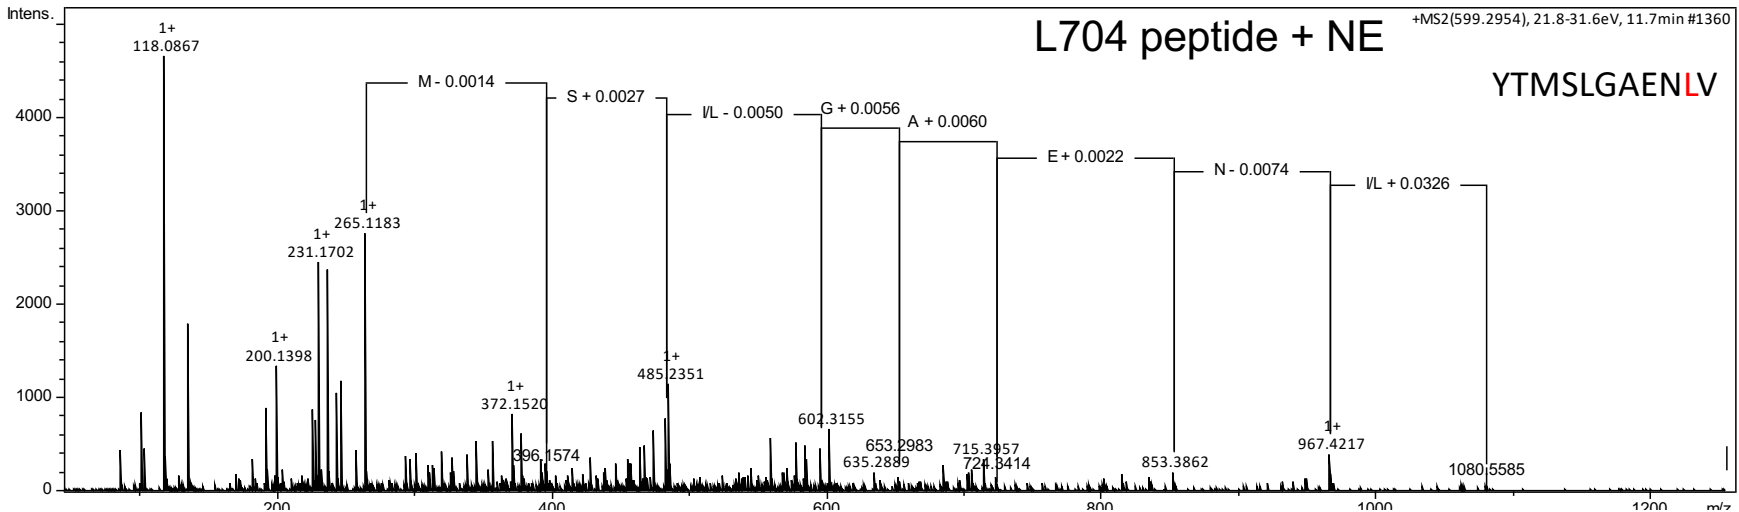

Supplementary data S7: Figure S7: Peptide digest with CatG, high-resolution MS/MS-spectra from peptides.

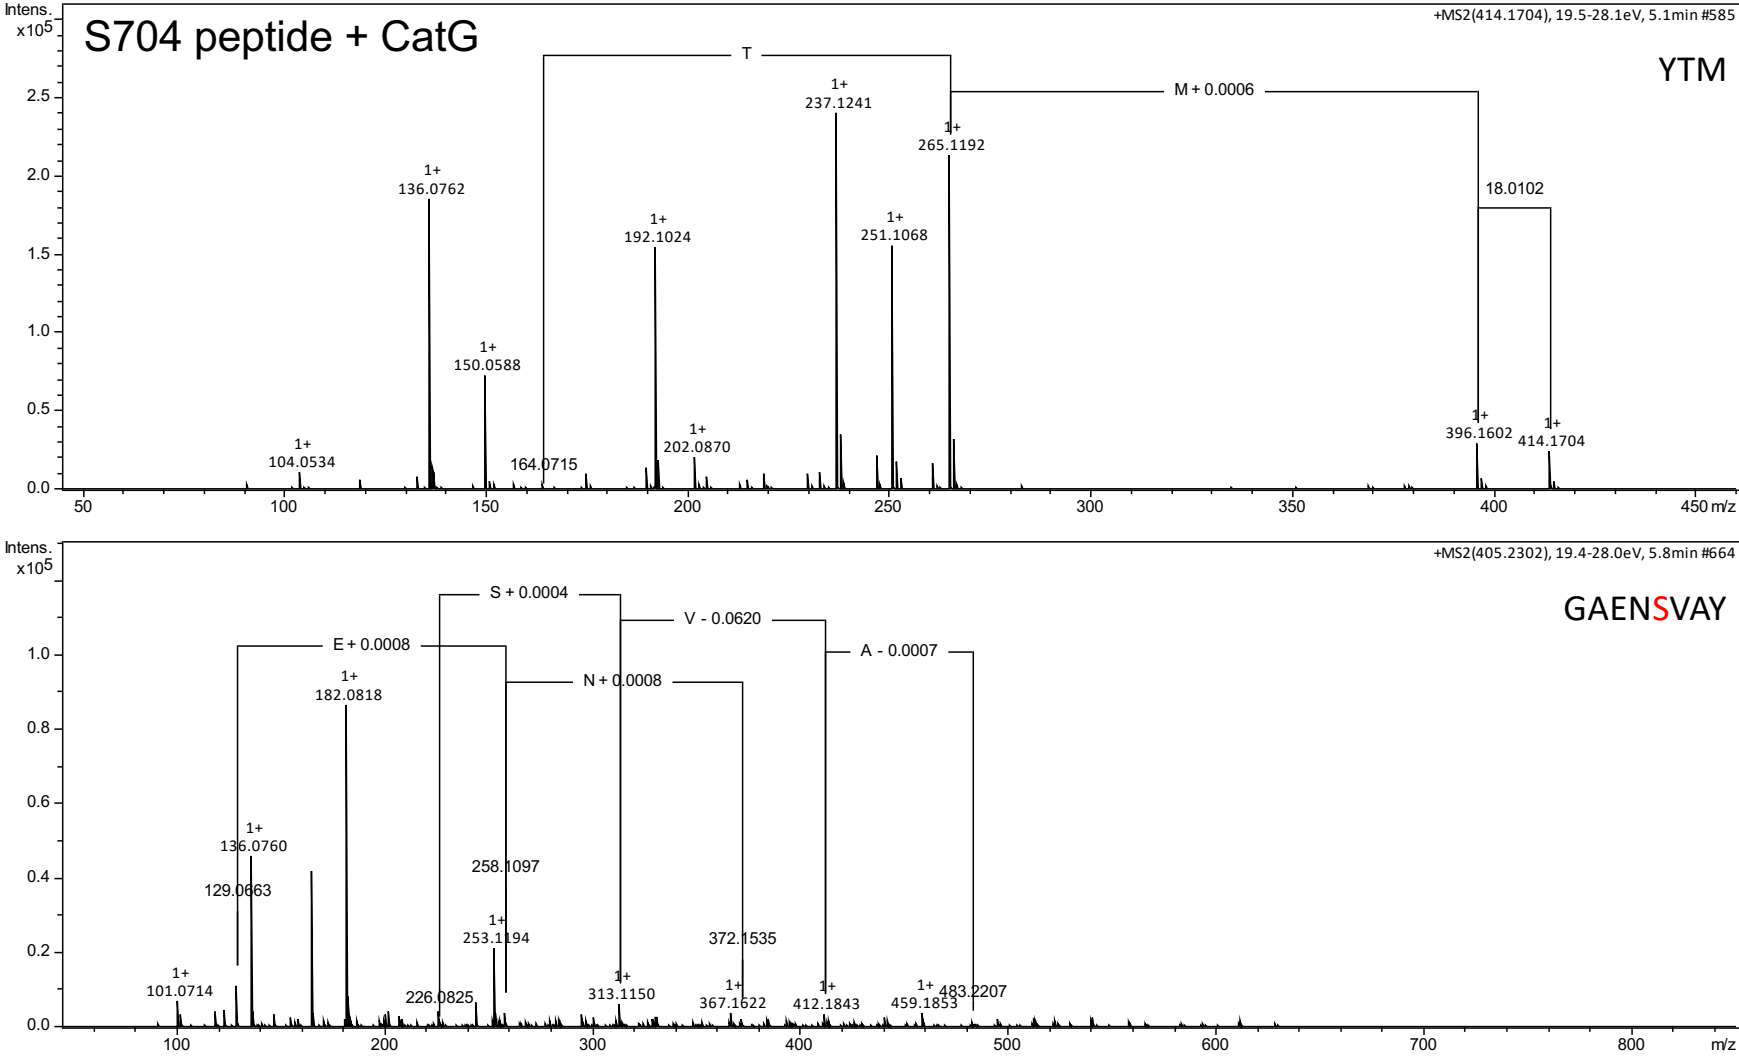

Supplementary data S7: Figure S7: Peptide digest with CatG, high-resolution MS/MS-spectra from peptides.

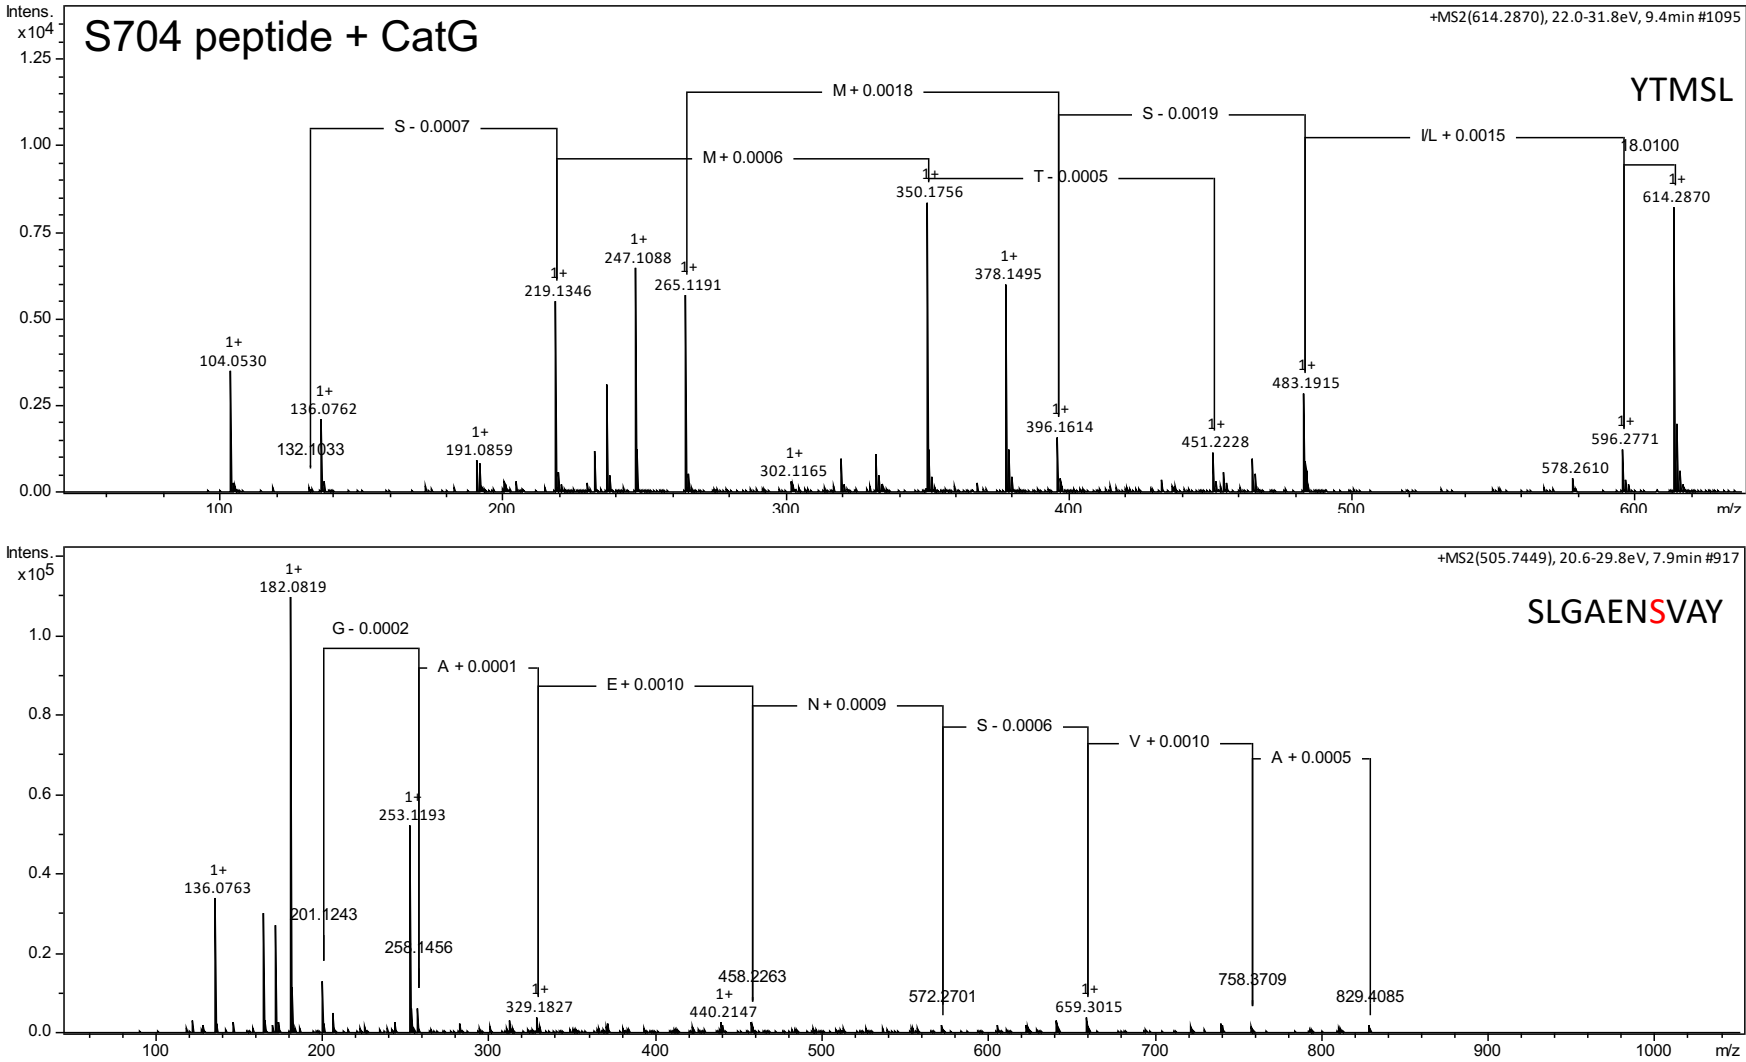



Supplementary data S7: Figure S7: Peptide digest with CatG, high-resolution MS/MS-spectra from peptides.

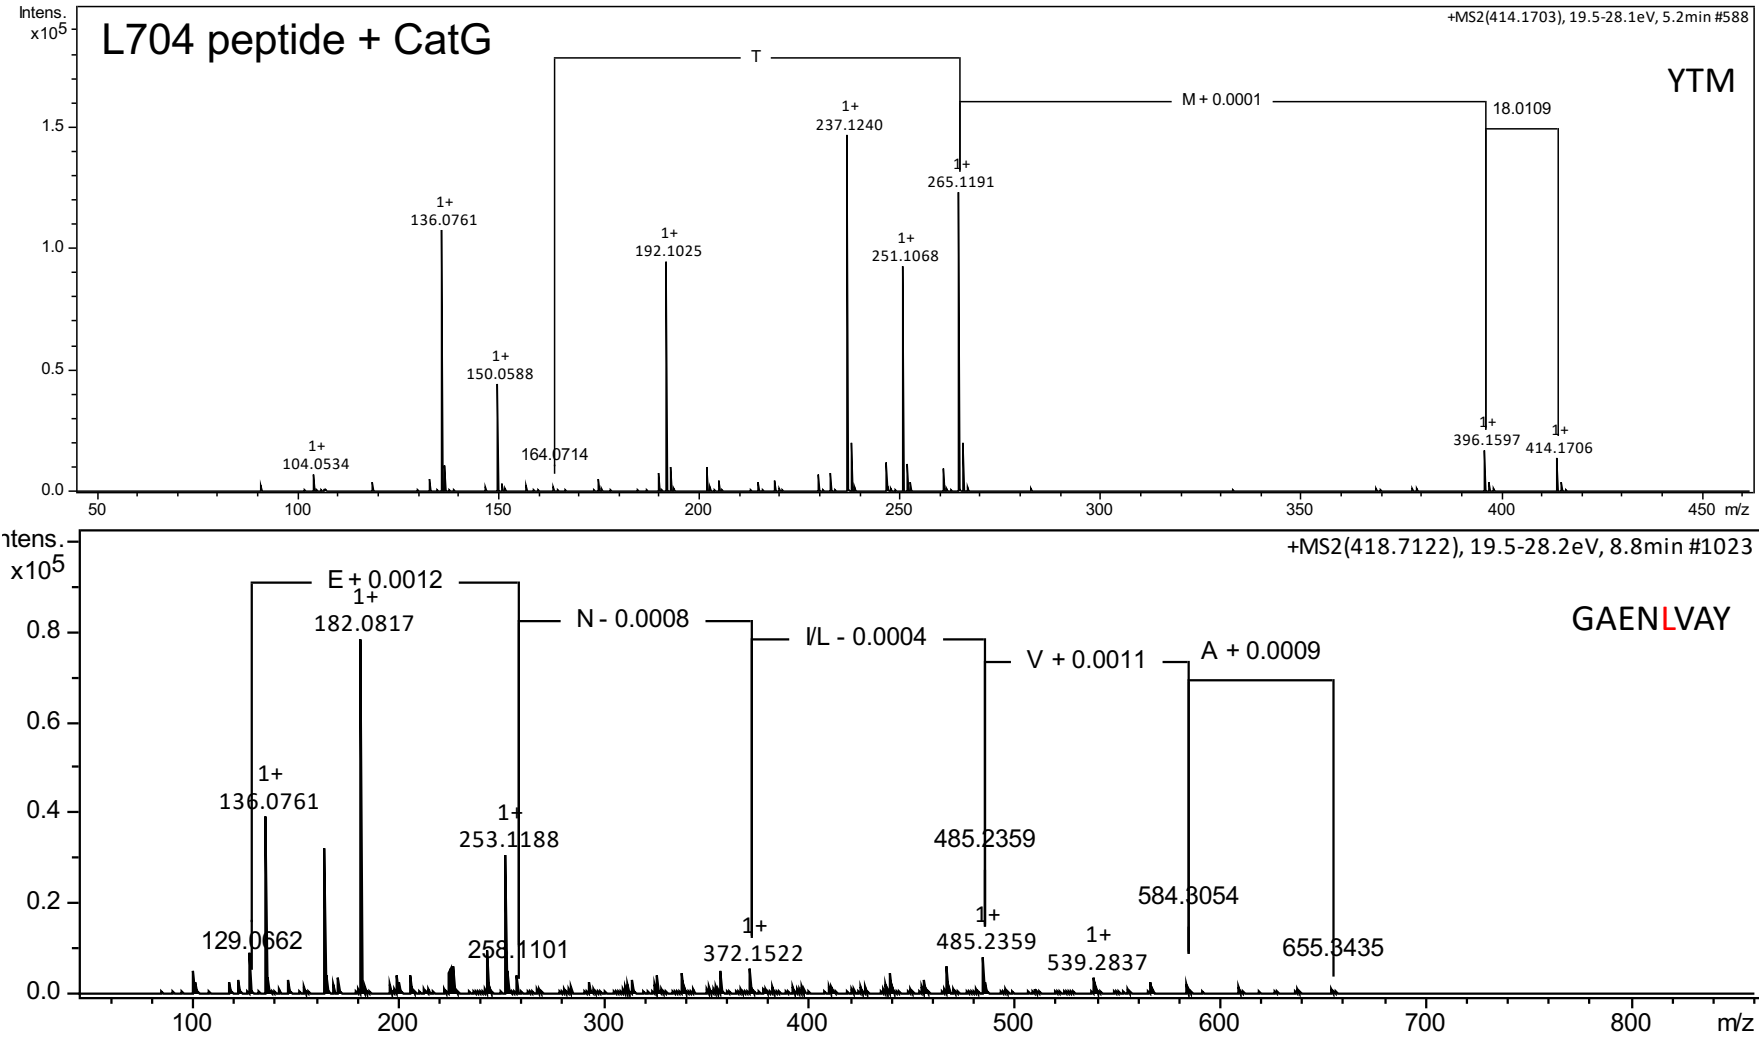

**Supplementary data S7:** Figure S8: Peptide digest with CatG, high-resolution MS/MS-spectra from peptides.

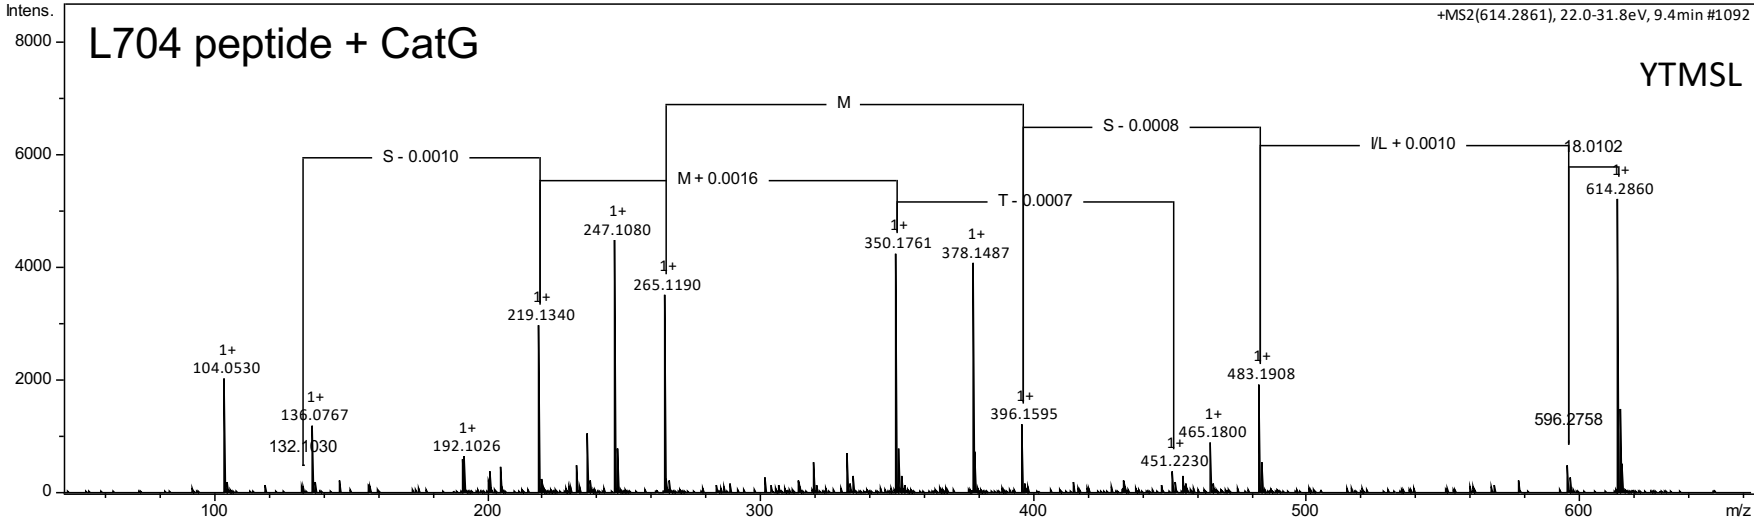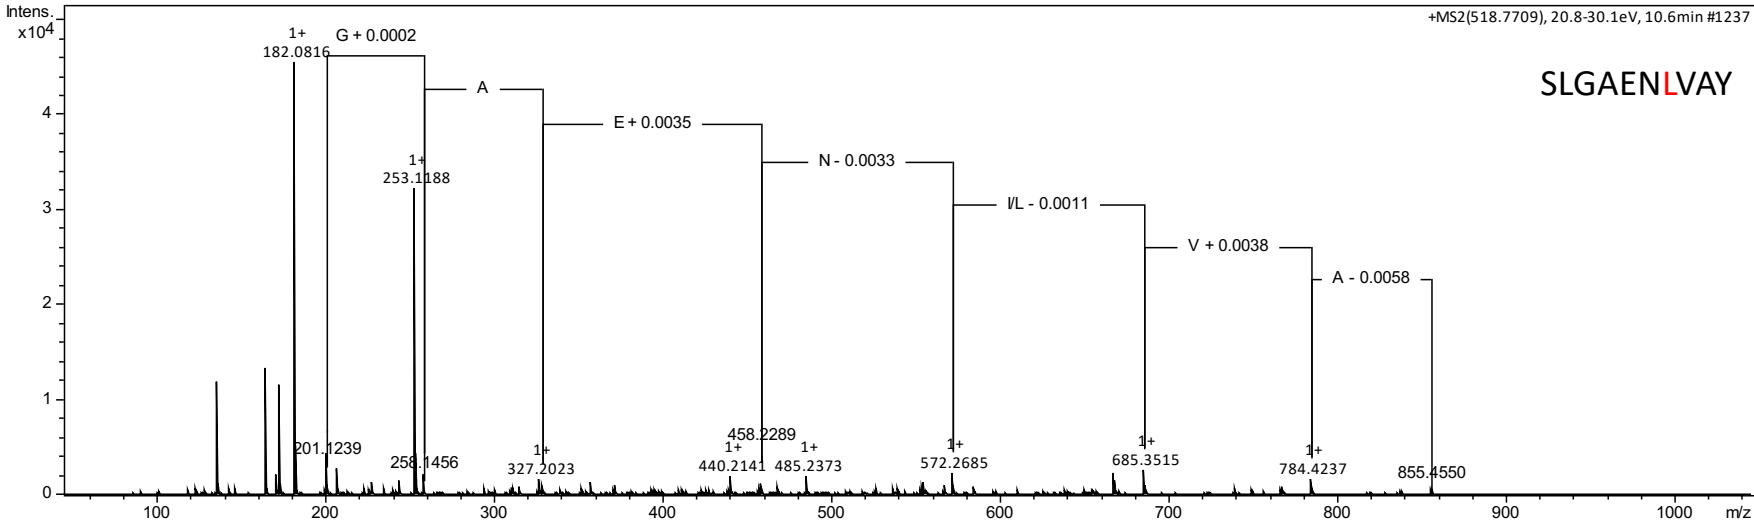

**Supplementary data S8:** Figure S8: Peptide digest with PR3, high-resolution MS/MS-spectra from peptides.

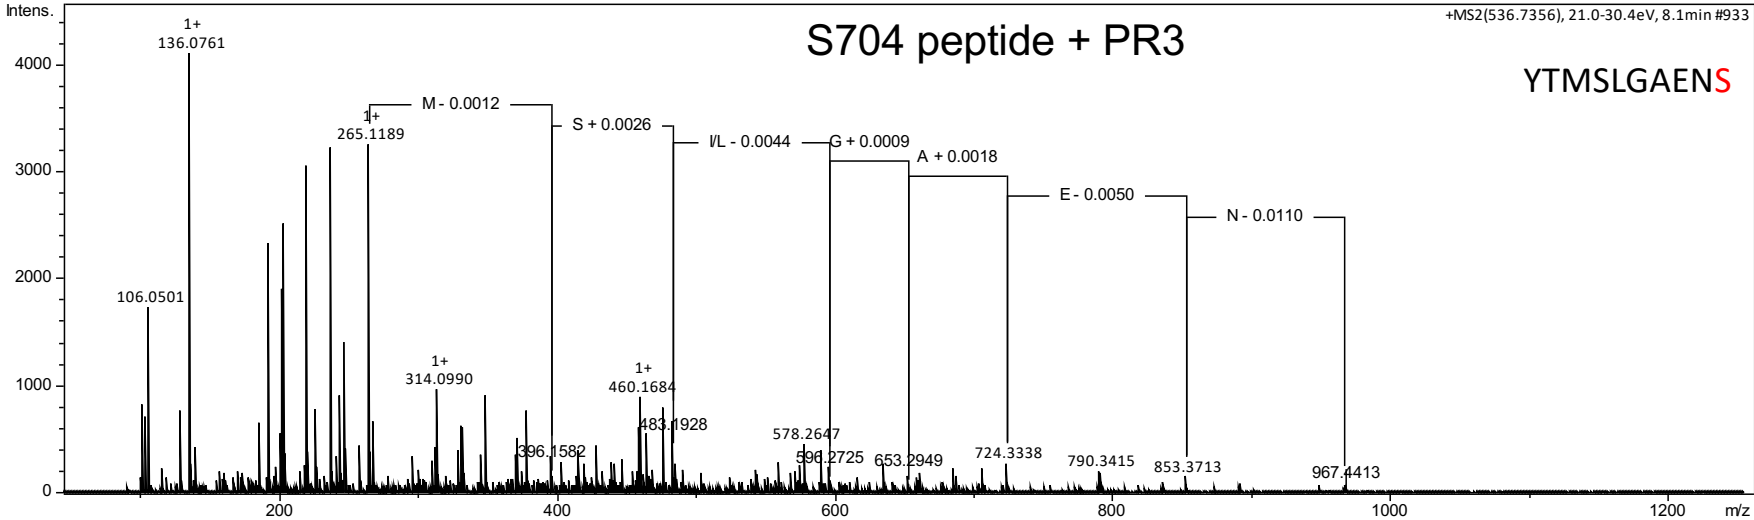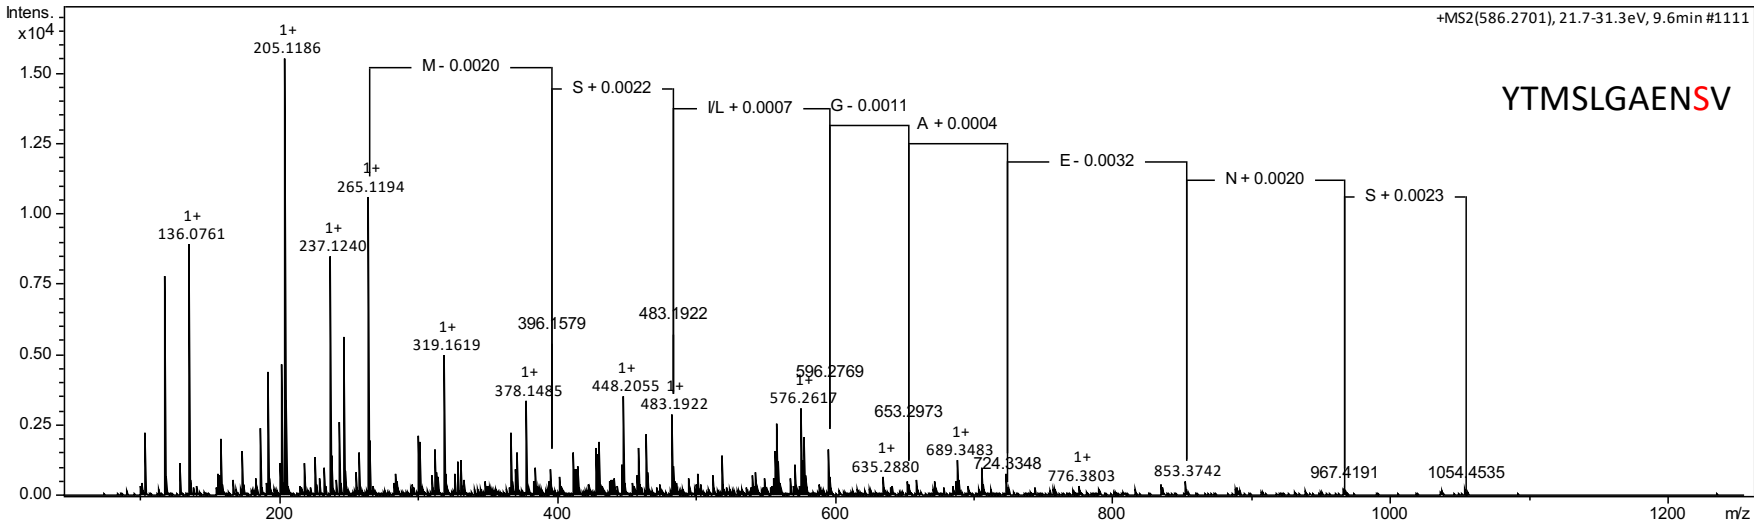

**Supplementary data S8:** Figure S8: Peptide digest with PR3, high-resolution MS/MS-spectra from peptides.

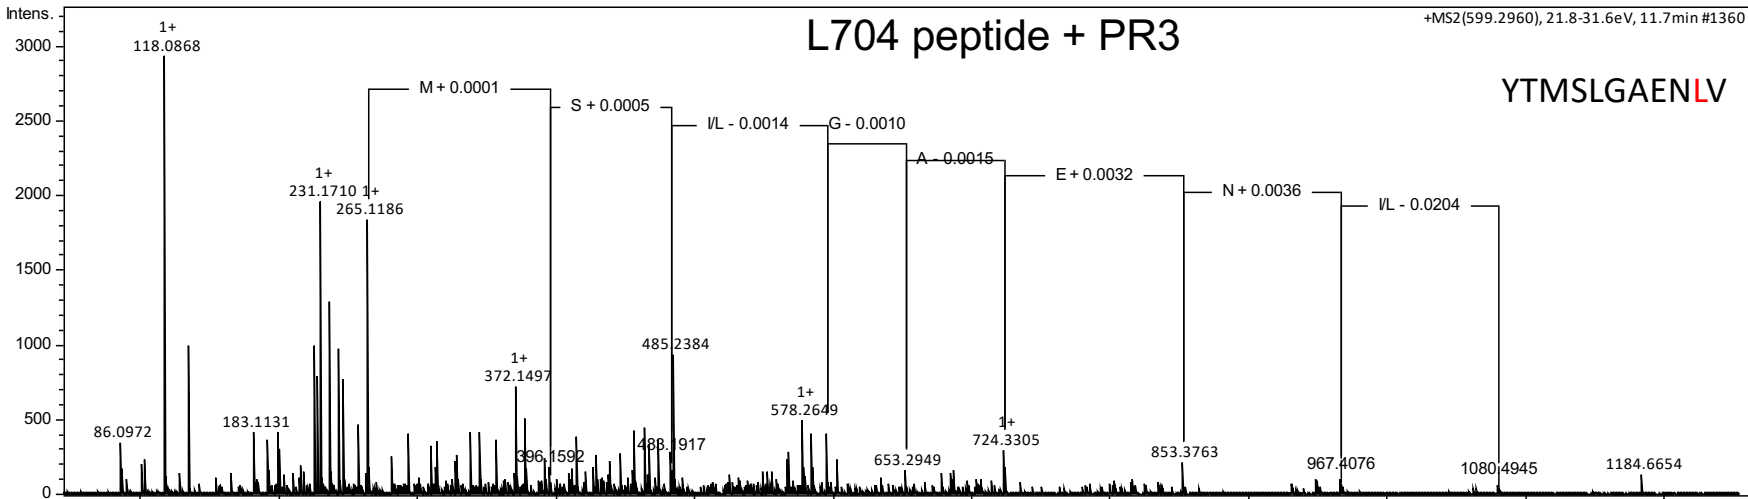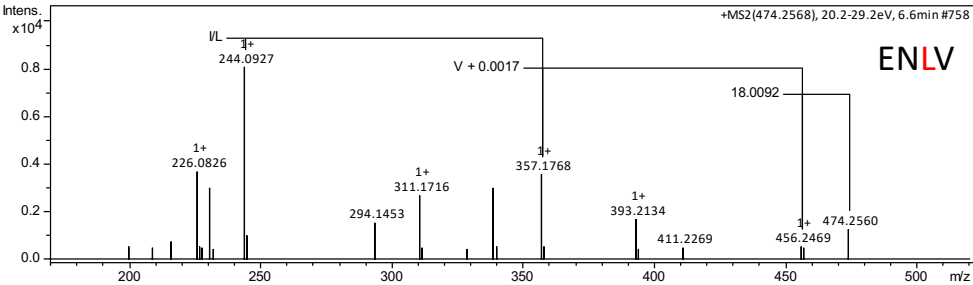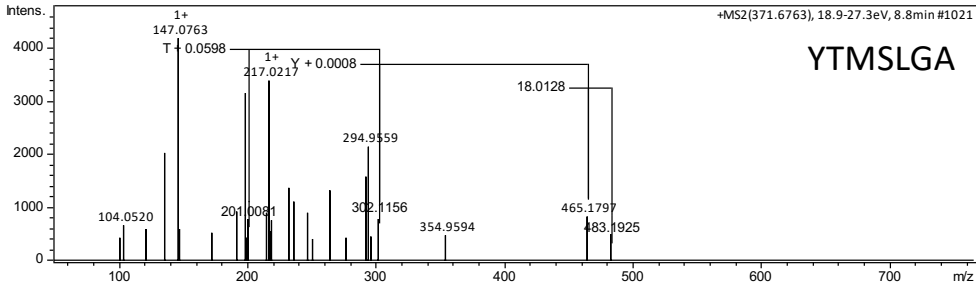

Supplement: s1 [file s1]
